# Supplementary material
Source: HighWire-hosted journal article supplement (https://spcare.bmj.com/content/bmjspcare-2019-002034)
Supplement: inline-supplementary-material-3 [file inline-supplementary-material-3.pdf]

## Appendix 2

2.1 Assessment time and measures of the two trials.<sup>a</sup>

| Week | 72h IEF   |           | 1h AUL    |           | ICIQ-SF score |           |
|------|-----------|-----------|-----------|-----------|---------------|-----------|
|      | MUI trial | SUI trial | MUI trial | SUI trial | MUI trial     | SUI trial |
| 0    | √         | √         | √         | √         | √             | √         |
| 2    | √         |           |           | √         |               |           |
| 4    | √         | √         | √         |           | √             |           |
| 6    | √         | √         |           | √         |               | √         |
| 8    | √         |           |           |           | √             |           |
| 10   | √         |           |           |           |               |           |
| 12   | √         |           | √         |           | √             |           |
| 15   |           | √         |           |           |               |           |
| 16   | √         | √         |           |           | √             |           |
| 17   |           | √         |           |           |               |           |
| 18   |           | √         |           |           |               | √         |
| 20   | √         |           |           |           | √             |           |
| 24   | √         |           |           |           | √             |           |
| 27   |           | √         |           |           |               |           |
| 28   | √         | √         |           |           | √             |           |
| 29   |           | √         |           |           |               |           |
| 30   |           | √         |           |           |               | √         |
| 32   | √         |           |           |           | √             |           |
| 36   | √         |           |           |           | √             |           |

Abbreviations: SUI, Stress urinary incontinence; MUI, mixed urinary incontinence; IEF, incontinence episode frequency; AUL, the amount of urine; ICIQ-SF, International Consultation on Incontinence Questionnaire-Short Form.

a.√ means that the measures of the original trials were conducted at the corresponding time point, and the blank space indicates that no measures were conducted.

## 2.2 The data of changes in the mean 72-h, 1h AUL and ICIQ-SF score of Fig. 1.

| Time                                        | Elderly<br>(N=92)  | Non-elderly<br>(N=292) | Difference (95% CI) | p-value |
|---------------------------------------------|--------------------|------------------------|---------------------|---------|
| Changes in the mean 72-h IEF, mean (95% CI) |                    |                        |                     |         |
| Week 2                                      | -2.0(-3.0 to -1.0) | -1.8(-2.4 to -1.3)     | 0.2(-1.0 to 1.4)    | 0.773   |
| Week 4                                      | -3.0(-4.1 to -1.9) | -2.8(-3.3 to -2.2)     | 0.2(-1.1 to 1.5)    | 0.733   |
| Week 6                                      | -4.1(-5.2 to -3.1) | -3.9(-4.4 to -3.3)     | 0.3(-1.0 to 1.5)    | 0.688   |

|                                                 |                      |                       |                    |       |
|-------------------------------------------------|----------------------|-----------------------|--------------------|-------|
| Week 8                                          | -3.3(-4.7 to -1.9)   | -4.9(-5.7 to -4.1)    | -1.6(-3.3 to 0.1)  | 0.066 |
| Week10                                          | -4.1(-5.4 to -2.7)   | -5.6(-6.4 to -4.9)    | -1.6(-3.2 to 0.1)  | 0.059 |
| Week 12                                         | -4.1(-5.4 to -2.8)   | -6.6(-7.3 to -5.8)    | -2.5(-4.1 to -0.9) | 0.003 |
| Week 15                                         | -6.0(-7.0 to -5.0)   | -4.3(-4.8 to -3.8)    | 1.7(0.5 to 2.9)    | 0.007 |
| Week 16                                         | -5.5(-6.3 to -4.6)   | -5.3(-5.7 to -4.8)    | 0.2(-0.8 to 1.2)   | 0.722 |
| Week 17                                         | -6.3(-7.3 to -5.3)   | -4.5(-5.0 to -4.0)    | 1.8(0.6 to 3.0)    | 0.003 |
| Week 18                                         | -5.9(-7.0 to -4.8)   | -4.6(-5.2 to -4.1)    | 1.2(-0.002 to 2.5) | 0.050 |
| Week 20                                         | -5.4(-6.9 to -4.0)   | -7.1(-8.0 to -6.3)    | -1.7(-3.5 to 0.1)  | 0.061 |
| Week 24                                         | -5.7(-7.1 to -4.2)   | -7.3(-8.2 to -6.5)    | -1.7(-3.4 to 0.1)  | 0.061 |
| Week 27                                         | -6.0(-7.1 to -4.8)   | -4.6(-5.2 to -4.0)    | 1.4(0.1 to 2.8)    | 0.040 |
| Week 28                                         | -6.2(-7.1 to -5.3)   | -5.7(-6.2 to -5.2)    | 0.5(-0.5 to 1.5)   | 0.343 |
| Week 29                                         | -6.3(-7.4 to -5.2)   | -4.8(-5.4 to -4.3)    | 1.4(0.2 to 2.7)    | 0.026 |
| Week 30                                         | -6.4(-7.5 to -5.2)   | -5.1(-5.6 to -4.5)    | 1.3(-0.04 to 2.6)  | 0.057 |
| Week 32                                         | -6.8(-8.2 to -5.3)   | -7.9(-8.5 to -6.9)    | -0.9(-2.7 to 0.8)  | 0.294 |
| Week 36                                         | -7.3(-8.6 to -6.0)   | -8.2(-9.0 to -7.5)    | -0.9(-2.5 to 0.7)  | 0.260 |
| Changes in the mean1h AUL(g), mean (95% CI)     |                      |                       |                    |       |
| Week 2                                          | -3.4(-7.0 to 0.1)    | -6.1(-8.0 to -4.3)    | -2.7(-6.8 to 1.5)  | 0.209 |
| Week 4                                          | -7.5(-10.5 to -4.5)  | -7.1(-8.9 to -5.3)    | 0.4(-3.2 to 4.1)   | 0.808 |
| Week 6                                          | -8.4(-11.7 to -5.1)  | -10.0(-11.6 to -8.3)  | -1.5(-5.4 to 2.3)  | 0.441 |
| Week 12                                         | -11.1(-14.2 to -7.9) | -12.4(-14.2 to -10.5) | -1.3(-5.2 to 2.5)  | 0.496 |
| Changes in the meanICIQ-SF score, mean (95% CI) |                      |                       |                    |       |

|         |                    |                    |                    |       |
|---------|--------------------|--------------------|--------------------|-------|
| Week 4  | -2.0(-2.7 to -1.2) | -2.5(-3.0 to -2.0) | -0.6(-1.5 to 0.4)  | 0.256 |
| Week 6  | -2.5(-3.2 to -1.8) | -2.4(-2.8 to -2.1) | 0.1(-0.7 to 0.9)   | 0.869 |
| Week 8  | -3.9(-4.8 to -2.9) | -4.4(-5.0 to -3.8) | -0.5(-1.7 to 0.7)  | 0.403 |
| Week 12 | -4.8(-6.0 to -3.6) | -6.3(-7.0 to -5.6) | -1.5(-2.9 to 0.02) | 0.054 |
| Week 16 | -5.5(-6.7 to -4.3) | -6.9(-7.7 to -6.2) | -1.4(-2.9 to 0.1)  | 0.061 |
| Week 18 | -4.3(-5.2 to -3.3) | -3.5(-3.9 to -3.0) | 0.8(-0.3 to 1.9)   | 0.151 |
| Week 20 | -6.1(-7.4 to -4.9) | -7.1(-7.9 to -6.4) | -1.0(-2.5 to 0.5)  | 0.201 |
| Week 24 | -6.7(-8.0 to -5.5) | -7.3(-8.0 to -6.6) | -0.6(-2.1 to 0.9)  | 0.457 |
| Week 28 | -7.0(-8.2 to -5.7) | -7.4(-8.1 to -6.6) | -0.4(-1.9 to 1.1)  | 0.598 |
| Week 30 | -4.7(-5.7 to -3.8) | -3.9(-4.4 to -3.5) | 0.8(-0.3 to 1.9)   | 0.152 |
| Week 32 | -7.1(-8.3 to -5.9) | -7.4(-8.1 to -6.7) | -0.3(-1.7 to 1.2)  | 0.710 |
| Week 36 | -7.7(-8.9 to -6.5) | -7.5(-8.2 to -6.9) | 0.1(-1.3 to 1.6)   | 0.860 |

Abbreviations: IEF, incontinence episode frequency; AUL, the amount of urine; ICIQ-SF, International Consultation on Incontinence Questionnaire-Short Form.

All results presented in the table and in the manuscript are based on consistent use of data for completers, without imputation.
